# Supplementary material for: Diagnostic Accuracy of WB-MRI and 123I-mIBG /131I-mIBG Imaging in Metastatic Pheochromocytoma and Paraganglioma: A Comparative Study
Source: Research Square preprint supplement (doi:10.21203/rs.3.rs-3893278/v1), 2024-02-06
Supplement: Supplementary file 1 [file 27c815d5ff19a26f4558f162.docx]

**Tables**

TABLE 1. Patient characteristics

Patient profiles (note: case No. 5 is the same as No. 4), the location of primary lesions, pathological diagnoses, and the presence of metastases in the lung, bone, liver, lymph nodes, and other areas.

F: female, M: male, +: one or up to five metastases, ++: more than 5 metastases.

TABLE 2. Category of number of metastases

Other locations of metastases: pleural dissemination (2 cases), retroperitoneal and pelvic dissemination (1 case), pleural invasion (1 case), local recurrence of retroperitoneal paraganglioma (1 case), posterior mediastinum (1 case), and peritoneal dissemination (2 cases).

TABLE 3. Diagnostic characteristics of each imaging modality

This table presents the sensitivity, specificity, accuracy, PPV, NPV, AUC, and p-value of 123/131I-*m*IBG images and WB-MRI in detecting metastases of each organ from PPGL, k-value indicating inter-reviewer agreement between reviewer 1 and reviewer 2.

PPV: positive predictive value, NPV: negative predictive value, AUC: area under the curve, N/A: not applicable.
